# Supplementary material for: Racial/Ethnic Variation in the Relationship Between Educational Assortative Mating and Wives' Income Trajectories
Source: Oxford University Press journal article supplement (doi:10.1215/00703370-10421624), 2023-01-20
Supplement: choi_esm.pdf [file choi_esm.pdf]

## **ONLINE APPENDIX**

### **Racial/Ethnic Variation in the Relationship Between Educational Assortative Mating and Wives' Income Trajectories**

Kate H. Choi and Patrick A Denice

#### **A. Additional details about our group-based developmental trajectory models**

In the first stage of our analysis, we use group-based developmental trajectory models (GBTMs) to identify latent clusters of married women's income trajectories during the initial 20 years of their first marriages. This type of discrete or finite mixed model identifies a set of predicted income trajectories based on information about the annual income earned by each spouse over the initial 20 years of first marriage. The models also compute the probability that a married woman follows each trajectory and allow us to visualize the timing, duration, and sequencing of wives' income trajectories and labor market participation (Nagin 2005). These models differ from hierarchical or growth curve models because they allow for the possibility that there are distinct latent or unobservable groups within the population with independent measures of central tendency, rather than assuming a sample mean represents the best estimate of central tendency (Nagin 2005).

Formally, the distribution of wives' work trajectories is denoted by  $P(Y_i|Year_i)$ , where the random vector  $Y_i$  represents wife  $i$ 's longitudinal sequence of their share of a couple's total income earned in each of the initial 20 years of their first marriage,  $Year_i$  (Jones & Nagin, 2013). The likelihood for each wife  $i$ , given  $j$  groups, is given by:

$$P(Y_i|Year_i) = \sum_{j=1}^J \pi^j \cdot P(Y_i|Year_i, j; \beta^j), \quad (1)$$

where  $\pi^j$  is the probability of membership in group  $j$ , and the conditional distribution of  $Y_i$  given membership in  $j$  is indexed by the unknown parameter  $\beta^j$ . These parameters define each group-specific trajectory's shape and minimally contain an intercept and usually one or more slope parameters to represent time. The number of these parameters depends on the polynomial complexity of each group's latent trajectory. Various configurations of  $\beta^j$  were tested. The best-fitting trajectories included an intercept and linear, squared, and cubic terms for the marital duration (in years).

For each group  $j$ , the model assumes conditional independence for the sequential realizations of  $Y_i$ , denoted by  $y_{it}$ , over the  $T$  years of observation (in this case  $T = 20$ ). Thus, the model in Equation (1) can be rewritten as:

$$P(Y_i | Year_i) = \prod_{t=1}^T p(y_{it} | year_{it}, j; \beta^j), \quad (2)$$

where  $p(\cdot)$  is the distribution of  $y_{it}$ , conditional on the year since the first marriage began of wife  $i$  in year  $t$  and on membership in group  $j$ . The identified trajectories represent prototypical pathways of married women's employment and thus provide "approximations of a more complex reality" (Nagin & Odgers 2010: 118).

## B. Appendix Tables

**Table A1.** Sample selection

|                                                                                                                                                                   | <i>N</i> persons | <i>N</i> person-years |
|-------------------------------------------------------------------------------------------------------------------------------------------------------------------|------------------|-----------------------|
| Initial sample of women in the NLSY79 sample                                                                                                                      | 6,283            |                       |
| <i>Sample restrictions:</i>                                                                                                                                       |                  |                       |
| Discontinued subsamples: (i) economically disadvantaged non-Black, non-Hispanic subsample (discontinued in 1991); (ii) military oversample (discontinued in 1985) | -1,357           |                       |
| Those who never reported getting married or date of first marriage                                                                                                | -854             |                       |
| Those who did not have at least one year in which they were in their first marriage with a spouse present                                                         | -248             |                       |
| Those whose spouse is missing education or age at first marriage                                                                                                  | -233             |                       |
| Those who have no information on the dependent variable between ages 18 and 55 or in first 20 years of marriage                                                   | -122             |                       |
| <i>N women in analytical sample</i>                                                                                                                               | <b>3,469</b>     | 41,005                |
| Respondent or spouse is not aged 18-55                                                                                                                            |                  | -3,630                |
| After 20 years of marriage                                                                                                                                        |                  | -5,197                |
| Missing share of annual income earned                                                                                                                             |                  | -2,458                |
| <i>N person-years in analytical sample</i>                                                                                                                        |                  | <b>29,720</b>         |

*Notes:* This table describes the restrictions made to the NLSY79 respondents to obtain our analytical sample. For additional details, see the main text.

**Table A2.** Number of married women by race/ethnicity and educational assortative mating

|          | Hypergamy<br>(H>W) | Homogamy<br>(H=W) | Hypogamy<br>(H<W) | Total |
|----------|--------------------|-------------------|-------------------|-------|
| NH White | 604                | 966               | 414               | 1984  |
| NH Black | 237                | 374               | 195               | 806   |
| Hispanic | 194                | 350               | 135               | 679   |

*Notes:* Table displays unweighted counts of our sample (total  $N=6,649$ ) by race/ethnicity and educational assortative mating.

**Table A3.** Parameters for group-based trajectories of married women's share of their couples' income earned, by race/ethnicity

|                             | Intercept  | Duration  | Duration-squared | Duration-cubed |
|-----------------------------|------------|-----------|------------------|----------------|
| <i>A. White women</i>       |            |           |                  |                |
| Consistently low secondary  | 27.848***  | -6.325*** | 0.535***         | -0.013***      |
| Consistently high secondary | 28.362***  | -2.229*** | 0.264***         | -0.006*        |
| Consistently equal          | 44.472***  | 0.197     | 0.047            | -0.002         |
| Consistently primary        | 59.293***  | 5.301***  | -0.385**         | 0.007          |
| From equal to secondary     | 59.579***  | -6.022*** | 0.128            | 0.003          |
| From primary to secondary   | 100.177*** | -6.558*** | 0.041            | 0.006          |
| <i>B. Black women</i>       |            |           |                  |                |
| Consistently low secondary  | 24.195***  | -3.618*** | 0.386***         | -0.011**       |
| Consistently equal          | 40.007***  | -0.383    | 0.125            | -0.004         |
| Consistently primary        | 72.556***  | 6.870**   | -0.676**         | 0.018*         |
| From equal to primary       | 37.440***  | 4.868*    | -0.078           | -0.005         |
| From primary to secondary   | 86.574***  | -6.784*** | 0.296            | -0.004         |
| <i>C. Hispanic women</i>    |            |           |                  |                |
| Consistently low secondary  | 19.047***  | -2.965**  | 0.217            | -0.003         |
| Consistently equal          | 38.142***  | 1.418     | -0.019           | -0.003         |
| Consistently primary        | 70.319***  | -0.197    | -0.019           | 0.001          |
| From secondary to equal     | 24.303***  | -5.109**  | 0.856***         | -0.027***      |
| From equal to secondary     | 53.952***  | -2.129    | -0.267           | 0.016*         |

Notes: Table provides the parameter estimates for the preferred developmental trajectory models by race/ethnicity. Parameters describe the shape of each trajectory. Statistical significance is indicated by: \* $p < .05$ , \*\* $p < .01$ , \*\*\* $p < .001$ .

**Table A4.** Multinomial logistic regression models predicting trajectory membership (base: “Consistently equal earner”), White wives

|                                       | Consistently<br>secondary, low |                     | Consistently<br>secondary, high |                     | Consistently<br>primary |                     | Decreasing equal<br>to secondary |                     | Decreasing primary<br>to secondary |                     |
|---------------------------------------|--------------------------------|---------------------|---------------------------------|---------------------|-------------------------|---------------------|----------------------------------|---------------------|------------------------------------|---------------------|
|                                       | OR                             | 95 <sup>th</sup> CI | OR                              | 95 <sup>th</sup> CI | OR                      | 95 <sup>th</sup> CI | OR                               | 95 <sup>th</sup> CI | OR                                 | 95 <sup>th</sup> CI |
| <b>Model 1: Zero-order</b>            |                                |                     |                                 |                     |                         |                     |                                  |                     |                                    |                     |
| <b>EAM (ref.=Homo)</b>                |                                |                     |                                 |                     |                         |                     |                                  |                     |                                    |                     |
| Hyper (W<H)                           | 1.97***                        | (1.49 - 2.61)       | 1.32                            | (0.96 - 1.83)       | 1.52                    | (0.90 - 2.57)       | 1.12                             | (0.78 - 1.61)       | 1.38                               | (0.79 - 2.41)       |
| Hypo (W>H)                            | 0.51***                        | (0.36 - 0.70)       | 0.63**                          | (0.44 - 0.89)       | 1.52                    | (0.93 - 2.47)       | 0.49***                          | (0.33 - 0.74)       | 0.65                               | (0.34 - 1.22)       |
| Intercept                             | 0.90                           | (0.76 - 1.07)       | 0.61***                         | (0.51 - 0.74)       | 0.15***                 | (0.11 - 0.21)       | 0.50***                          | (0.40 - 0.61)       | 0.14***                            | (0.10 - 0.20)       |
| <b>Model 2: M1+ Family background</b> |                                |                     |                                 |                     |                         |                     |                                  |                     |                                    |                     |
| <b>EAM (Homo)</b>                     |                                |                     |                                 |                     |                         |                     |                                  |                     |                                    |                     |
| Hyper (W<H)                           | 1.95***                        | (1.47 - 2.58)       | 1.31                            | (0.95 - 1.81)       | 1.50                    | (0.89 - 2.53)       | 1.13                             | (0.79 - 1.62)       | 1.40                               | (0.80 - 2.45)       |
| Hypo (W>H)                            | 0.51***                        | (0.37 - 0.71)       | 0.64*                           | (0.45 - 0.91)       | 1.51                    | (0.92 - 2.46)       | 0.48***                          | (0.32 - 0.73)       | 0.65                               | (0.35 - 1.22)       |
| <b>Family structure at 14</b>         |                                |                     |                                 |                     |                         |                     |                                  |                     |                                    |                     |
| Two parent hh                         | 0.75                           | (0.55 - 1.02)       | 0.96                            | (0.68 - 1.37)       | 0.56*                   | (0.34 - 0.91)       | 1.07                             | (0.70 - 1.64)       | 2.12                               | (0.97 - 4.66)       |
| <b>Mother's traits</b>                |                                |                     |                                 |                     |                         |                     |                                  |                     |                                    |                     |
| Less than HS                          | 1.33*                          | (1.01 - 1.73)       | 1.32                            | (0.98 - 1.79)       | 0.90                    | (0.55 - 1.47)       | 0.73                             | (0.50 - 1.06)       | 1.04                               | (0.60 - 1.80)       |
| Worked at age 14                      | 0.93                           | (0.71 - 1.21)       | 0.90                            | (0.67 - 1.22)       | 1.12                    | (0.68 - 1.86)       | 1.00                             | (0.71 - 1.41)       | 0.96                               | (0.56 - 1.63)       |
| Intercept                             | 1.10                           | (0.75 - 1.63)       | 0.63*                           | (0.40 - 0.97)       | 0.23***                 | (0.11 - 0.46)       | 0.50**                           | (0.30 - 0.84)       | 0.07***                            | (0.031 - 0.17)      |
| <b>Model 3: M2+ Gender beliefs</b>    |                                |                     |                                 |                     |                         |                     |                                  |                     |                                    |                     |
| <b>EAM (ref.=Homo)</b>                |                                |                     |                                 |                     |                         |                     |                                  |                     |                                    |                     |
| Hyper (W<H)                           | 1.90***                        | (1.43 - 2.53)       | 1.31                            | (0.95 - 1.82)       | 1.51                    | (0.89 - 2.55)       | 1.13                             | (0.79 - 1.63)       | 1.40                               | (0.80 - 2.44)       |
| Hypo (W>H)                            | 0.55***                        | (0.39 - 0.76)       | 0.66*                           | (0.46 - 0.94)       | 1.42                    | (0.87 - 2.33)       | 0.51**                           | (0.34 - 0.76)       | 0.67                               | (0.35 - 1.25)       |
| <b>Family structure at 14</b>         |                                |                     |                                 |                     |                         |                     |                                  |                     |                                    |                     |
| Two parent hh                         | 0.78                           | (0.57 - 1.06)       | 1.01                            | (0.70 - 1.44)       | 0.55*                   | (0.34 - 0.90)       | 1.09                             | (0.71 - 1.66)       | 2.14                               | (0.97 - 4.71)       |
| <b>Maternal traits at 14</b>          |                                |                     |                                 |                     |                         |                     |                                  |                     |                                    |                     |
| Less than HS (higher)                 | 1.22                           | (0.93 - 1.60)       | 1.26                            | (0.93 - 1.71)       | 0.94                    | (0.58 - 1.55)       | 0.71                             | (0.49 - 1.04)       | 1.02                               | (0.59 - 1.77)       |
| Working (Not)                         | 0.99                           | (0.75 - 1.31)       | 0.92                            | (0.68 - 1.25)       | 1.10                    | (0.67 - 1.82)       | 1.01                             | (0.71 - 1.42)       | 0.97                               | (0.57 - 1.66)       |
| <b>Gender beliefs</b>                 |                                |                     |                                 |                     |                         |                     |                                  |                     |                                    |                     |
| Traditional values                    | 1.59***                        | (1.25 - 2.00)       | 1.16                            | (0.90 - 1.51)       | 0.67                    | (0.43 - 1.06)       | 0.94                             | (0.70 - 1.25)       | 1.07                               | (0.71 - 1.60)       |
| Anticipated work -35                  | 0.69*                          | (0.47 - 1.00)       | 0.72                            | (0.48 - 1.08)       | 0.76                    | (0.40 - 1.45)       | 0.64                             | (0.41 - 1.01)       | 0.75                               | (0.36 - 1.57)       |
| <b>Anticipated # child (0)</b>        |                                |                     |                                 |                     |                         |                     |                                  |                     |                                    |                     |
| One                                   | 1.89*                          | (1.02 - 3.51)       | 2.45**                          | (1.25 - 4.81)       | 0.63                    | (0.25 - 1.54)       | 1.61                             | (0.70 - 3.70)       | 1.03                               | (0.31 - 3.40)       |
| Two or more                           | 1.66*                          | (1.08 - 2.68)       | 1.59                            | (0.93 - 2.73)       | 0.58                    | (0.32 - 1.04)       | 1.98*                            | (1.04 - 3.76)       | 1.25                               | (0.54 - 2.88)       |
| Intercept                             | 0.92                           | (0.47 - 1.78)       | 0.51                            | (0.24 - 1.09)       | 0.43                    | (0.15 - 1.20)       | 0.39*                            | (0.16 - 0.92)       | 0.08***                            | (0.02 - 0.27)       |

Table A4 (Continued)

|                                         | Consistently<br>secondary, low |                     | Consistently<br>secondary, high |                     | Consistently primary<br>earner |                     | Decreasing, equal to<br>secondary |                     | Decreasing, primary<br>to secondary |                     |
|-----------------------------------------|--------------------------------|---------------------|---------------------------------|---------------------|--------------------------------|---------------------|-----------------------------------|---------------------|-------------------------------------|---------------------|
|                                         | OR                             | 95 <sup>th</sup> CI | OR                              | 95 <sup>th</sup> CI | OR                             | 95 <sup>th</sup> CI | OR                                | 95 <sup>th</sup> CI | OR                                  | 95 <sup>th</sup> CI |
| <b>Model 4: M3+ Respondent's Traits</b> |                                |                     |                                 |                     |                                |                     |                                   |                     |                                     |                     |
| <b>EAM (ref.=Homo)</b>                  |                                |                     |                                 |                     |                                |                     |                                   |                     |                                     |                     |
| Hyper (W<H)                             | 1.61**                         | (1.17 - 2.20)       | 1.02                            | (0.71 - 1.44)       | 1.60                           | (0.87 - 2.94)       | 1.21                              | (0.81 - 1.82)       | 1.30                                | (0.68 - 2.50)       |
| Hypo (W>H)                              | 0.60**                         | (0.42 - 0.86)       | 0.70                            | (0.48 - 1.02)       | 1.41                           | (0.84 - 2.36)       | 0.45***                           | (0.29 - 0.69)       | 0.61                                | (0.31 - 1.20)       |
| <b>Two parents at 14</b>                | 0.89                           | (0.64 - 1.22)       | 1.07                            | (0.74 - 1.55)       | 0.52*                          | (0.32 - 0.86)       | 0.95                              | (0.62 - 1.46)       | 2.20                                | (0.98 - 4.94)       |
| <b>Mom: LTHS (higher)</b>               | 1.00                           | (0.74 - 1.35)       | 1.03                            | (0.74 - 1.42)       | 1.07                           | (0.63 - 1.81)       | 0.94                              | (0.62 - 1.44)       | 1.07                                | (0.62 - 1.87)       |
| <b>Working mother (Not)</b>             | 0.95                           | (0.71 - 1.26)       | 0.87                            | (0.63 - 1.19)       | 1.13                           | (0.68 - 1.86)       | 1.08                              | (0.76 - 1.53)       | 0.95                                | (0.56 - 1.62)       |
| <b>Gender beliefs</b>                   |                                |                     |                                 |                     |                                |                     |                                   |                     |                                     |                     |
| <b>Traditional values</b>               | 1.35*                          | (1.05 - 1.72)       | 0.99                            | (0.76 - 1.31)       | 0.70                           | (0.44 - 1.10)       | 1.04                              | (0.77 - 1.40)       | 1.04                                | (0.67 - 1.61)       |
| <b>Anticipated to work -35</b>          | 0.71                           | (0.48 - 1.04)       | 0.76                            | (0.50 - 1.16)       | 0.77                           | (0.40 - 1.46)       | 0.57*                             | (0.35 - 0.90)       | 0.74                                | (0.36 - 1.53)       |
| <b>Anticipated # of child (0)</b>       |                                |                     |                                 |                     |                                |                     |                                   |                     |                                     |                     |
| One                                     | 1.51                           | (0.79 - 2.88)       | 2.25*                           | (1.15 - 4.42)       | 0.69                           | (0.28 - 1.69)       | 1.92                              | (0.81 - 4.55)       | 0.95                                | (0.28 - 3.28)       |
| Two or more                             | 1.27                           | (0.75 - 2.16)       | 1.55                            | (0.90 - 2.68)       | 0.62                           | (0.36 - 1.13)       | 1.87                              | (0.94 - 3.70)       | 0.97                                | (0.39 - 2.44)       |
| <b>Education (High school)</b>          |                                |                     |                                 |                     |                                |                     |                                   |                     |                                     |                     |
| Less than HS                            | 1.57                           | (0.98 - 2.51)       | 1.94*                           | (1.17 - 3.22)       | 0.81                           | (0.29 - 2.27)       | 1.85                              | (0.90 - 3.80)       | 1.19                                | (0.38 - 3.75)       |
| Some college                            | 0.93                           | (0.65 - 1.33)       | 1.03                            | (0.70 - 1.51)       | 1.18                           | (0.65 - 2.15)       | 1.82**                            | (1.19 - 2.80)       | 1.46                                | (0.76 - 2.81)       |
| College graduate                        | 0.87                           | (0.56 - 1.35)       | 0.73                            | (0.46 - 1.18)       | 1.23                           | (0.62 - 2.44)       | 2.02**                            | (1.24 - 3.28)       | 1.27                                | (0.58 - 2.81)       |
| <b>Premarital birth (None)</b>          | 0.89                           | (0.57 - 1.39)       | 0.67                            | (0.39 - 1.13)       | 0.63                           | (0.27 - 1.50)       | 0.25**                            | (0.10 - 0.67)       | 1.17                                | (0.39 - 3.48)       |
| <b>Age at marriage (15-19)</b>          |                                |                     |                                 |                     |                                |                     |                                   |                     |                                     |                     |
| 20-24                                   | 0.87                           | (0.60 - 1.26)       | 0.84                            | (0.56 - 1.26)       | 0.62                           | (0.30 - 1.30)       | 1.65                              | (0.93 - 2.92)       | 0.97                                | (0.45 - 2.08)       |
| 25-29                                   | 0.61*                          | (0.39 - 0.97)       | 0.44**                          | (0.26 - 0.75)       | 0.70                           | (0.30 - 1.66)       | 1.49                              | (0.77 - 2.86)       | 0.74                                | (0.29 - 1.92)       |
| 30+                                     | 0.47*                          | (0.24 - 0.83)       | 0.88                            | (0.49 - 1.56)       | 0.80                           | (0.34 - 1.93)       | 1.06                              | (0.49 - 2.29)       | 0.39                                | (0.09 - 1.64)       |
| <b>Unemployment spell (None)</b>        |                                |                     |                                 |                     |                                |                     |                                   |                     |                                     |                     |
| Unemployed                              | 2.36***                        | (1.79 - 3.11)       | 1.53**                          | (1.13 - 2.08)       | 1.06                           | (0.68 - 1.69)       | 1.10                              | (0.79 - 1.52)       | 1.19                                | (0.71 - 1.98)       |
| <b>Intercept</b>                        | 0.93                           | (0.43 - 2.02)       | 0.56                            | (0.24 - 1.30)       | 0.51                           | (0.15 - 1.74)       | 0.22**                            | (0.08 - 0.64)       | 0.09**                              | (0.02 - 0.42)       |

Table A4 (Continued)

|                                    | Consistently secondary,<br>low |                     | Consistently secondary,<br>high |                     | Consistently primary<br>earner |                     | Decreasing, equal to<br>secondary |                     | Decreasing, primary to<br>secondary |                     |
|------------------------------------|--------------------------------|---------------------|---------------------------------|---------------------|--------------------------------|---------------------|-----------------------------------|---------------------|-------------------------------------|---------------------|
|                                    | OR                             | 95 <sup>th</sup> CI | OR                              | 95 <sup>th</sup> CI | OR                             | 95 <sup>th</sup> CI | OR                                | 95 <sup>th</sup> CI | OR                                  | 95 <sup>th</sup> CI |
| <b>Model 5: M4+ Partner traits</b> |                                |                     |                                 |                     |                                |                     |                                   |                     |                                     |                     |
| <b>EAM (ref.=Homo)</b>             |                                |                     |                                 |                     |                                |                     |                                   |                     |                                     |                     |
| Hyper (W<H)                        | 1.63**                         | (1.18 - 2.25)       | 1.00                            | (0.70 - 1.43)       | 1.44                           | (0.78 - 2.67)       | 1.16                              | (0.77 - 1.77)       | 0.86                                | (0.42 - 1.76)       |
| Hypo (W>H)                         | 0.62**                         | (0.43 - 0.88)       | 0.71                            | (0.48 - 1.03)       | 1.28                           | (0.76 - 2.17)       | 0.44***                           | (0.28 - 0.67)       | 0.52                                | (0.25 - 1.09)       |
| <b>Maternal trait at 14</b>        |                                |                     |                                 |                     |                                |                     |                                   |                     |                                     |                     |
| Two parent hh                      | 0.86                           | (0.62 - 1.19)       | 1.04                            | (0.71 - 1.50)       | 0.54*                          | (0.32 - 0.89)       | 0.97                              | (0.62 - 1.51)       | 2.30                                | (0.92 - 5.71)       |
| LT HS (higher)                     | 1.01                           | (0.75 - 1.37)       | 1.05                            | (0.76 - 1.46)       | 1.10                           | (0.64 - 1.88)       | 0.92                              | (0.60 - 1.40)       | 0.95                                | (0.49 - 1.83)       |
| Working (Not)                      | 0.91                           | (0.68 - 1.22)       | 0.83                            | (0.61 - 1.14)       | 1.21                           | (0.71 - 2.04)       | 1.15                              | (0.80 - 1.66)       | 1.08                                | (0.58 - 2.00)       |
| <b>Gender beliefs</b>              |                                |                     |                                 |                     |                                |                     |                                   |                     |                                     |                     |
| Traditional values                 | 1.36*                          | (1.06 - 1.75)       | 1.01                            | (0.77 - 1.34)       | 0.63                           | (0.39 - 1.02)       | 0.98                              | (0.72 - 1.34)       | 0.87                                | (0.52 - 1.45)       |
| Ant. work 35                       | 0.69                           | (0.47 - 1.02)       | 0.75                            | (0.49 - 1.13)       | 0.81                           | (0.42 - 1.58)       | 0.58*                             | (0.36 - 0.94)       | 0.94                                | (0.40 - 2.19)       |
| <b>Ant. # of child (0)</b>         |                                |                     |                                 |                     |                                |                     |                                   |                     |                                     |                     |
| One                                | 1.51                           | (0.78 - 2.91)       | 2.32*                           | (1.18 - 4.56)       | 0.68                           | (0.27 - 1.72)       | 1.75                              | (0.73 - 4.19)       | 0.71                                | (0.17 - 3.05)       |
| Two or more                        | 1.31                           | (0.78 - 2.22)       | 1.61                            | (0.93 - 2.79)       | 0.62                           | (0.32 - 1.17)       | 1.68                              | (0.84 - 3.34)       | 0.78                                | (0.27 - 2.28)       |
| <b>Education (High school)</b>     |                                |                     |                                 |                     |                                |                     |                                   |                     |                                     |                     |
| Less than HS                       | 1.66*                          | (1.03 - 2.69)       | 2.12**                          | (1.26 - 3.56)       | 0.62                           | (0.22 - 1.77)       | 1.68                              | (0.80 - 3.55)       | 0.85                                | (0.27 - 2.66)       |
| Some college                       | 0.90                           | (0.62 - 1.30)       | 1.00                            | (0.67 - 1.48)       | 1.32                           | (0.72 - 2.41)       | 1.89**                            | (1.22 - 2.95)       | 1.61                                | (0.79 - 3.28)       |
| College graduate                   | 0.85                           | (0.54 - 1.33)       | 0.71                            | (0.44 - 1.16)       | 1.39                           | (0.69 - 2.80)       | 2.14**                            | (1.32 - 3.47)       | 1.58                                | (0.66 - 3.80)       |
| <b>Children from prior union</b>   |                                |                     |                                 |                     |                                |                     |                                   |                     |                                     |                     |
| Had (Did not)                      | 0.90                           | (0.58 - 1.41)       | 0.65                            | (0.37 - 1.13)       | 0.60                           | (0.24 - 1.52)       | 0.26**                            | (0.10 - 0.68)       | 1.26                                | (0.45 - 3.59)       |
| <b>Age at marriage (15-19)</b>     |                                |                     |                                 |                     |                                |                     |                                   |                     |                                     |                     |
| 20-24                              | 0.86                           | (0.59 - 1.27)       | 0.86                            | (0.57 - 1.30)       | 0.64                           | (0.30 - 1.38)       | 1.61                              | (0.89 - 2.94)       | 0.91                                | (0.37 - 2.25)       |
| 25-29                              | 0.59*                          | (0.36 - 0.98)       | 0.46**                          | (0.26 - 0.82)       | 0.67                           | (0.27 - 1.70)       | 1.40                              | (0.70 - 2.81)       | 0.65                                | (0.20 - 2.09)       |
| 30+                                | 0.44*                          | (0.22 - 0.85)       | 0.97                            | (0.51 - 1.85)       | 0.82                           | (0.33 - 2.05)       | 0.95                              | (0.42 - 2.19)       | 0.41                                | (0.08 - 2.08)       |
| <b>Unemployment spell (None)</b>   |                                |                     |                                 |                     |                                |                     |                                   |                     |                                     |                     |
| Unemployed                         | 2.54***                        | (1.91 - 3.38)       | 1.65**                          | (1.21 - 2.26)       | 0.77                           | (0.47 - 1.26)       | 0.92                              | (0.66 - 1.29)       | 0.61                                | (0.33 - 1.13)       |



Table A4 (Continued)

|                                              | Consistently secondary, low |                     | Consistently secondary, high |                     | Consistently primary earner |                     | Decreasing, equal to secondary |                     | Decreasing, primary to secondary |                     |
|----------------------------------------------|-----------------------------|---------------------|------------------------------|---------------------|-----------------------------|---------------------|--------------------------------|---------------------|----------------------------------|---------------------|
|                                              | OR                          | 95 <sup>th</sup> CI | OR                           | 95 <sup>th</sup> CI | OR                          | 95 <sup>th</sup> CI | OR                             | 95 <sup>th</sup> CI | OR                               | 95 <sup>th</sup> CI |
| <b>Husband's income (below poverty line)</b> |                             |                     |                              |                     |                             |                     |                                |                     |                                  |                     |
| 100-199% poverty                             | 0.85                        | (0.45 - 1.60)       | 1.76                         | (0.85-3.64)         | 0.30**                      | (0.13-0.69)         | 0.44*                          | (0.23-0.83)         | 0.12***                          | (0.04 - 0.30)       |
| 200+% poverty                                | 2.11**                      | (1.31 - 3.39)       | 3.01***                      | (1.71 - 5.30)       | 0.14***                     | (0.08-0.24)         | 0.28***                        | (0.18-0.44)         | 0.01***                          | (0.00 - 0.02)       |
| <b>Pre-mar cohab (No)</b>                    | 0.97                        | (0.72 - 1.32)       | 1.04                         | (0.75 - 1.45)       | 1.08                        | (0.67-1.75)         | 1.04                           | (0.72-1.50)         | 0.90                             | (0.46 - 1.76)       |
| <b>Age gap (Wife is older: W&gt;H)</b>       |                             |                     |                              |                     |                             |                     |                                |                     |                                  |                     |
| H>W: ≤4 years                                | 1.15                        | (0.78 - 1.68)       | 1.66*                        | (1.04 - 2.64)       | 1.01                        | (0.56-1.83)         | 0.67*                          | (0.45-1.00)         | 0.49*                            | (0.25 - 0.97)       |
| H>W: 5+ years                                | 1.27                        | (0.83 - 1.94)       | 1.71*                        | (1.02 - 2.87)       | 1.31                        | (0.65-2.63)         | 0.47**                         | (0.28 - 0.79)       | 0.52                             | (0.23 - 1.18)       |
| <b>Intercept</b>                             | 0.45                        | (0.17 - 1.15)       | 0.13***                      | (0.05 - 0.39)       | 1.99                        | (0.48-8.28)         | 0.99                           | (0.30 - 3.25)       | 2.14                             | (0.31 - 14.69)      |

Notes: Data come from the NLSY79. Multinomial logistic regression models are estimated on the sub-sample of White women ( $N=1,984$ ). Coefficients are presented as relative risk ratios; 95% confidence intervals are in parentheses. Analyses are weighted. Statistical significance is indicated by: \* $p<.05$ , \*\* $p<.01$ , \*\*\* $p<.001$ .

**Table A5.** Multinomial logistic regression models predicting trajectory group membership (base: consistently equal earner), Black wives

|                                       | Consistently secondary, low |                     | Consistently primary earner |                     | Increasing, equal to primary |                     | Decreasing, primary to secondary |                     |
|---------------------------------------|-----------------------------|---------------------|-----------------------------|---------------------|------------------------------|---------------------|----------------------------------|---------------------|
|                                       | OR                          | 95 <sup>th</sup> CI | OR                          | 95 <sup>th</sup> CI | OR                           | 95 <sup>th</sup> CI | OR                               | 95 <sup>th</sup> CI |
| <b>Model 1: Zero-order</b>            |                             |                     |                             |                     |                              |                     |                                  |                     |
| <b>EAM (ref.=Homo)</b>                |                             |                     |                             |                     |                              |                     |                                  |                     |
| Hyper (W<H)                           | 1.11                        | (0.76 - 1.64)       | 0.68                        | (0.32 - 1.47)       | 0.48                         | (0.21 - 1.06)       | 1.03                             | (0.55 - 1.93)       |
| Hypo (W>H)                            | 0.49**                      | (0.30 - 0.80)       | 1.14                        | (0.56 - 2.31)       | 1.32                         | (0.71 - 2.46)       | 1.41                             | (0.78 - 2.56)       |
| Intercept                             | 0.71**                      | (0.55 - 0.90)       | 0.15***                     | (0.10 - 0.23)       | 0.20***                      | (0.13 - 0.31)       | 0.19***                          | (0.13 - 0.27)       |
| <b>Model 2: M1+ Family background</b> |                             |                     |                             |                     |                              |                     |                                  |                     |
| <b>EAM (ref.=Homo)</b>                |                             |                     |                             |                     |                              |                     |                                  |                     |
| Hyper (W<H)                           | 1.11                        | (0.71 - 1.63)       | 0.68                        | (0.31 - 1.47)       | 0.48                         | (0.21 - 1.06)       | 1.09                             | (0.58 - 2.04)       |
| Hypo (W>H)                            | 0.49**                      | (0.30 - 0.80)       | 1.14                        | (0.56 - 2.30)       | 1.31                         | (0.70 - 2.43)       | 1.43                             | (0.78 - 2.59)       |
| <b>Mother's traits at 14</b>          |                             |                     |                             |                     |                              |                     |                                  |                     |
| Two parent hh                         | 0.92                        | (0.65 - 1.30)       | 0.95                        | (0.52 - 1.75)       | 1.02                         | (0.58 - 1.82)       | 1.53                             | (0.92 - 2.54)       |
| Less than HS                          | 1.34                        | (0.94 - 1.92)       | 1.02                        | (0.56 - 1.86)       | 0.74                         | (0.42 - 1.30)       | 1.30                             | (0.77 - 2.20)       |
| Worked at age 14                      | 0.97                        | (0.67 - 1.40)       | 0.93                        | (0.50 - 1.71)       | 0.95                         | (0.53 - 1.71)       | 1.37                             | (0.77 - 2.45)       |
| Intercept                             | 0.64                        | (0.40 - 1.01)       | 0.16***                     | (0.08 - 0.34)       | 0.24***                      | (0.11 - 0.52)       | 0.10***                          | (0.05 - 0.21)       |
| <b>Model 3: M2+ Gender beliefs</b>    |                             |                     |                             |                     |                              |                     |                                  |                     |
| <b>EAM (ref.=Homo)</b>                |                             |                     |                             |                     |                              |                     |                                  |                     |
| Hyper (W<H)                           | 1.04                        | (0.70 - 1.55)       | 0.67                        | (0.31 - 1.45)       | 0.48                         | (0.22 - 1.07)       | 1.06                             | (0.57 - 2.00)       |
| Hypo (W>H)                            | 0.50**                      | (0.30 - 0.81)       | 1.15                        | (0.56 - 2.38)       | 1.34                         | (0.71 - 2.51)       | 1.48                             | (0.81 - 2.71)       |
| <b>Maternal traits at 14</b>          |                             |                     |                             |                     |                              |                     |                                  |                     |
| Two parent hh                         | 0.89                        | (0.63 - 1.27)       | 0.96                        | (0.52 - 1.75)       | 1.03                         | (0.58 - 1.85)       | 1.50                             | (0.89 - 2.52)       |
| Less than HS (higher)                 | 1.30                        | (0.90 - 1.87)       | 1.03                        | (0.56 - 1.91)       | 0.73                         | (0.41 - 1.29)       | 1.29                             | (0.77 - 2.17)       |
| Working (Not)                         | 0.97                        | (0.67 - 1.42)       | 0.90                        | (0.48 - 1.70)       | 0.99                         | (0.54 - 1.81)       | 1.43                             | (0.79 - 2.59)       |
| <b>Gender beliefs</b>                 |                             |                     |                             |                     |                              |                     |                                  |                     |
| Traditional values                    | 1.47*                       | (1.06 - 2.04)       | 0.97                        | (0.53 - 1.75)       | 1.12                         | (0.67 - 1.85)       | 1.24                             | (0.77 - 2.01)       |
| Anticipated to work -35               | 1.05                        | (0.55 - 2.04)       | 0.78                        | (0.24 - 2.56)       | 0.89                         | (0.33 - 2.44)       | 1.05                             | (0.37 - 2.99)       |
| <b>Anticipated # of child (0)</b>     |                             |                     |                             |                     |                              |                     |                                  |                     |
| One                                   | 0.43*                       | (0.19 - 0.98)       | 0.61                        | (0.16 - 2.33)       | 3.03                         | (0.33 - 27.84)      | 1.24                             | (0.36 - 4.30)       |
| Two or more                           | 0.50*                       | (0.25 - 0.99)       | 0.51                        | (0.17 - 1.54)       | 2.70                         | (0.34 - 21.81)      | 0.86                             | (0.28 - 2.60)       |
| Intercept                             | 1.30                        | (0.47 - 3.58)       | 0.37                        | (0.07 - 2.08)       | 0.10                         | (0.01 - 1.09)       | 0.11**                           | (0.02 - 0.55)       |

Table A5 (Continued)

|                                       | Consistently<br>secondary, low |                     | Consistently<br>primary earner |                     | Increasing, equal to<br>primary |                     | Decreasing, primary<br>to secondary |                     |
|---------------------------------------|--------------------------------|---------------------|--------------------------------|---------------------|---------------------------------|---------------------|-------------------------------------|---------------------|
|                                       | OR                             | 95 <sup>th</sup> CI | OR                             | 95 <sup>th</sup> CI | OR                              | 95 <sup>th</sup> CI | OR                                  | 95 <sup>th</sup> CI |
| <b>Model 4: M3+ Respondent traits</b> |                                |                     |                                |                     |                                 |                     |                                     |                     |
| <b>EAM (ref.=Homo)</b>                |                                |                     |                                |                     |                                 |                     |                                     |                     |
| Hyper (W<H)                           | 0.92                           | (0.59 - 1.44)       | 0.65                           | (0.27 - 1.57)       | 0.43*                           | (0.20 - 0.94)       | 1.21                                | (0.58 - 2.53)       |
| Hypo (W>H)                            | 0.61                           | (0.35 - 1.05)       | 1.85                           | (0.83 - 4.11)       | 1.37                            | (0.70 - 2.72)       | 1.78                                | (0.87 - 3.62)       |
| <b>Maternal traits at 14</b>          |                                |                     |                                |                     |                                 |                     |                                     |                     |
| Two parent hh                         | 0.96                           | (0.69 - 1.37)       | 0.99                           | (0.54 - 1.82)       | 1.05                            | (0.59 - 1.86)       | 1.51                                | (0.89 - 2.55)       |
| Less than HS (higher)                 | 1.19                           | (0.81 - 1.73)       | 0.88                           | (0.46 - 1.70)       | 0.70                            | (0.39 - 1.27)       | 1.24                                | (0.73 - 2.11)       |
| Working (Not)                         | 1.04                           | (0.70 - 1.55)       | 0.89                           | (0.47 - 1.71)       | 0.99                            | (0.53 - 1.83)       | 1.44                                | (0.78 - 2.63)       |
| <b>Traditional values</b>             | 1.30                           | (0.90 - 1.88)       | 0.87                           | (0.47 - 1.64)       | 1.09                            | (0.67 - 1.77)       | 1.23                                | (0.74 - 2.06)       |
| <b>Anticipated to work -35</b>        | 1.10                           | (0.57 - 2.12)       | 0.83                           | (0.23 - 2.96)       | 0.93                            | (0.34 - 2.53)       | 1.02                                | (0.35 - 2.94)       |
| <b>Anticipated # of child (0)</b>     |                                |                     |                                |                     |                                 |                     |                                     |                     |
| One                                   | 0.42*                          | (0.18 - 0.95)       | 0.61                           | (0.15 - 2.41)       | 2.96                            | (0.30-28.95)        | 1.35                                | (0.37 - 4.85)       |
| Two or more                           | 0.45*                          | (0.22 - 0.92)       | 0.45                           | (0.14 - 1.44)       | 2.60                            | (0.31-21.81)        | 0.91                                | (0.29 - 2.80)       |
| <b>Education (High school)</b>        |                                |                     |                                |                     |                                 |                     |                                     |                     |
| Less than HS                          | 1.27                           | (0.72 - 2.24)       | 0.97                           | (0.32 - 2.94)       | 1.39                            | (0.56 - 3.48)       | 0.65                                | (0.22 - 1.91)       |
| Some college                          | 0.94                           | (0.58 - 1.53)       | 0.34*                          | (0.14 - 0.80)       | 0.94                            | (0.45 - 1.95)       | 0.64                                | (0.33 - 1.24)       |
| College graduate                      | 0.55                           | (0.23 - 1.30)       | 0.50                           | (0.18 - 1.45)       | 1.04                            | (0.45 - 2.42)       | 0.74                                | (0.26 - 2.10)       |
| <b>Premarital birth (None)</b>        | 1.06                           | (0.69 - 1.62)       | 1.16                           | (0.58 - 2.31)       | 1.09                            | (0.57 - 2.07)       | 0.89                                | (0.50 - 1.58)       |
| <b>Age at marriage (15-19)</b>        |                                |                     |                                |                     |                                 |                     |                                     |                     |
| 20-24                                 | 1.28                           | (0.72 - 2.26)       | 0.79                           | (0.30 - 2.10)       | 0.90                            | (0.39 - 2.11)       | 1.68                                | (0.68 - 4.13)       |
| 25-29                                 | 1.30                           | (0.65 - 2.61)       | 0.90                           | (0.29 - 2.78)       | 1.38                            | (0.53 - 3.58)       | 1.07                                | (0.36 - 3.19)       |
| 30+                                   | 1.03                           | (0.48 - 2.19)       | 0.59                           | (0.17 - 1.98)       | 0.95                            | (0.32 - 2.76)       | 1.36                                | (0.45- 4.16)        |
| <b>Had unemployed spell (Not)</b>     | 2.12***                        | (1.42 - 3.19)       | 0.59                           | (0.29 - 1.20)       | 1.47                            | (0.81 - 2.68)       | 1.23                                | (0.70 - 2.14)       |
| <b>Intercept</b>                      | 0.69                           | (0.22 - 2.22)       | 0.82                           | (0.11 - 5.85)       | 0.08*                           | (0.01 - 0.95)       | 0.08**                              | (0.01 - 0.54)       |

Table A5 (Continued)

|                                        | Consistently<br>secondary, low |                     | Consistently<br>primary earner |                     | Increasing, equal to<br>primary |                     | Decreasing, primary<br>to secondary |                     |
|----------------------------------------|--------------------------------|---------------------|--------------------------------|---------------------|---------------------------------|---------------------|-------------------------------------|---------------------|
|                                        | OR                             | 95 <sup>th</sup> CI | OR                             | 95 <sup>th</sup> CI | OR                              | 95 <sup>th</sup> CI | OR                                  | 95 <sup>th</sup> CI |
| <b>Model 5: M4+ Partnership Traits</b> |                                |                     |                                |                     |                                 |                     |                                     |                     |
| <b>EAM (ref.=Homo)</b>                 |                                |                     |                                |                     |                                 |                     |                                     |                     |
| Hyper (W<H)                            | 0.94                           | (0.60- 1.47)        | 0.72                           | (0.29 - 1.81)       | 0.43*                           | (0.19 - 0.94)       | 1.24                                | (0.52 - 2.97)       |
| Hypo (W>H)                             | 0.61                           | (0.35 - 1.06)       | 1.68                           | (0.68 - 4.18)       | 1.39                            | (0.69 - 2.80)       | 1.57                                | (0.72 - 3.46)       |
| <b>Maternal traits at 14</b>           |                                |                     |                                |                     |                                 |                     |                                     |                     |
| Two parent hh                          | 0.93                           | (0.65 - 1.34)       | 1.15                           | (0.58 - 2.30)       | 1.13                            | (0.65 - 1.98)       | 1.93*                               | (1.03 - 3.61)       |
| Less than HS (higher)                  | 1.23                           | (0.83 - 1.82)       | 0.74                           | (0.36 - 1.53)       | 0.65                            | (0.37 - 1.17)       | 1.27                                | (0.70 - 2.32)       |
| Working (Not)                          | 1.03                           | (0.69 - 1.54)       | 1.13                           | (0.57 - 2.27)       | 0.99                            | (0.52 - 1.89)       | 1.81                                | (0.94 - 3.49)       |
| <b>Traditional values</b>              | 1.34                           | (0.93 - 1.92)       | 0.84                           | (0.39 - 1.80)       | 1.01                            | (0.62 - 1.65)       | 1.06                                | (0.57 - 2.00)       |
| <b>Anticipated to work -35</b>         | 1.09                           | (0.57 - 2.07)       | 0.66                           | (0.15 - 2.87)       | 0.83                            | (0.31 - 2.24)       | 0.87                                | (0.32 - 2.34)       |
| <b>Anticipated # of child (0)</b>      |                                |                     |                                |                     |                                 |                     |                                     |                     |
| One                                    | 0.42*                          | (0.18 - 0.98)       | 0.47                           | (0.10 - 2.29)       | 3.32                            | (0.32-34.37)        | 1.10                                | (0.26 - 4.71)       |
| Two or more                            | 0.45*                          | (0.22 - 0.93)       | 0.44                           | (0.11 - 1.70)       | 3.09                            | (0.35-27.25)        | 0.87                                | (0.23 - 3.35)       |
| <b>Education (High school)</b>         |                                |                     |                                |                     |                                 |                     |                                     |                     |
| Less than HS                           | 1.33                           | (0.76 - 2.34)       | 0.76                           | (0.22 - 2.62)       | 1.25                            | (0.49 - 3.19)       | 0.50                                | (0.15 - 1.65)       |
| Some college                           | 0.91                           | (0.56 - 1.47)       | 0.50                           | (0.19 - 1.31)       | 0.98                            | (0.48 - 2.03)       | 0.99                                | (0.44- 2.25)        |
| College graduate                       | 0.55                           | (0.23 - 1.31)       | 1.21                           | (0.33 - 4.51)       | 1.18                            | (0.49 - 2.83)       | 1.87                                | (0.52 - 6.72)       |
| Premarital birth (None)                | 1.04                           | (0.69 - 1.59)       | 1.11                           | (0.49 - 2.48)       | 1.08                            | (0.57 - 2.06)       | 0.90                                | (0.45 - 1.80)       |
| <b>Age at marriage (15-19)</b>         |                                |                     |                                |                     |                                 |                     |                                     |                     |
| 20-24                                  | 1.36                           | (0.77 - 2.39)       | 0.60                           | (0.17 - 2.09)       | 0.75                            | (0.31 - 1.83)       | 1.31                                | (0.44 - 3.93)       |
| 25-29                                  | 1.35                           | (0.66 - 2.78)       | 0.85                           | (0.18 - 3.87)       | 0.98                            | (0.36 - 2.67)       | 1.13                                | (0.30 - 4.28)       |
| 30+                                    | 1.13                           | (0.52 - 2.49)       | 0.89                           | (0.19 - 4.04)       | 0.68                            | (0.22 - 2.14)       | 2.51                                | (0.61-10.32)        |

Table A5 (Continued)

|                                              | Consistently<br>secondary, low |                     | Consistently<br>primary earner |                     | Increasing,<br>equal to primary |                     | Decreasing,<br>primary to secondary |                     |
|----------------------------------------------|--------------------------------|---------------------|--------------------------------|---------------------|---------------------------------|---------------------|-------------------------------------|---------------------|
|                                              | OR                             | 95 <sup>th</sup> CI | OR                             | 95 <sup>th</sup> CI | OR                              | 95 <sup>th</sup> CI | OR                                  | 95 <sup>th</sup> CI |
| <b>Husband's income (Below poverty line)</b> |                                |                     |                                |                     |                                 |                     |                                     |                     |
| 100-199% poverty                             | 1.68                           | (0.84 - 3.35)       | 0.09***                        | (0.03 - 0.34)       | 0.89                            | (0.33 - 2.44)       | 0.20***                             | (0.09 - 0.46)       |
| 200+% poverty                                | 1.53                           | (0.89 - 2.61)       | 0.03***                        | (0.01 - 0.07)       | 0.49                            | (0.22 - 1.08)       | 0.02***                             | (0.01 - 0.05)       |
| <b>Pre-mar coh (Not)</b>                     | 1.12                           | (0.73 - 1.70)       | 0.86                           | (0.38 - 1.95)       | 1.77                            | (0.98 - 3.20)       | 1.13                                | (0.57 - 2.23)       |
| <b>Age gap (Wife is older: W&gt;H)</b>       |                                |                     |                                |                     |                                 |                     |                                     |                     |
| H>W: ≤ 4 years                               | 1.49                           | (0.87 - 2.53)       | 0.68                           | (0.32 - 1.48)       | 0.67                            | (0.32 - 1.39)       | 1.27                                | (0.64 - 2.52)       |
| H>W: 5+ years                                | 1.39                           | (0.77 - 2.49)       | 0.61                           | (0.23 - 1.65)       | 0.90                            | (0.42 - 1.92)       | 0.67                                | (0.26- 1.72)        |
| Constant                                     | 0.32                           | (0.08 - 1.25)       | 9.80                           | (0.92-104.40)       | 0.16                            | (0.01 - 2.19)       | 0.48                                | (0.05 - 4.68)       |

Notes: Data come from the NLSY79. Multinomial logistic regression models are estimated on the sub-sample of Black women ( $N=806$ ). Coefficients are presented as relative risk ratios; 95% confidence intervals are in parentheses. Analyses are weighted. Statistical significance is indicated by: \* $p<.05$ , \*\* $p<.01$ , \*\*\* $p<.001$ .

**Table A6.** Multinomial logistic regression models predicting trajectory group membership (referent category: “wife is consistently equal earner”), Hispanic wives

|                                       | Consistently<br>secondary, low |               | Consistently primary<br>earner |               | Increasing,<br>secondary to equal |               | Decreasing, equal to<br>secondary |               |
|---------------------------------------|--------------------------------|---------------|--------------------------------|---------------|-----------------------------------|---------------|-----------------------------------|---------------|
|                                       | OR                             | 95th CI       | OR                             | 95th CI       | OR                                | 95th CI       | OR                                | 95th CI       |
| <b>Model 1: Zero-order</b>            |                                |               |                                |               |                                   |               |                                   |               |
| <b>EAM (ref.=Homo)</b>                |                                |               |                                |               |                                   |               |                                   |               |
| Hyper (W<H)                           | 1.21                           | (0.78 - 1.88) | 1.15                           | (0.56 - 2.36) | 0.80                              | (0.40 - 1.62) | 0.86                              | (0.42 - 1.77) |
| Hypo (W>H)                            | 0.99                           | (0.57 - 1.70) | 2.46*                          | (1.19 - 5.07) | 1.05                              | (0.48 - 2.30) | 2.00                              | (0.96 - 4.14) |
| Intercept                             | 0.69**                         | (0.53 - 0.90) | 0.17***                        | (0.11 - 0.26) | 0.27***                           | (0.18 - 0.41) | 0.21***                           | (0.14 - 0.31) |
| <b>Model 2: M1+ Family background</b> |                                |               |                                |               |                                   |               |                                   |               |
| <b>EAM (ref.=Homo)</b>                |                                |               |                                |               |                                   |               |                                   |               |
| Hyper (W<H)                           | 1.23                           | (0.79 - 1.92) | 1.14                           | (0.55 - 2.34) | 0.80                              | (0.40 - 1.60) | 0.81                              | (0.39 - 1.68) |
| Hypo (W>H)                            | 1.02                           | (0.59 - 1.76) | 2.52*                          | (1.22 - 5.22) | 1.06                              | (0.49 - 2.31) | 1.84                              | (0.88 - 3.85) |
| <b>Family structure at 14</b>         |                                |               |                                |               |                                   |               |                                   |               |
| Two parent hh                         | 0.89                           | (0.59 - 1.37) | 0.79                           | (0.43 - 1.47) | 1.30                              | (0.69 - 2.46) | 1.20                              | (0.62 - 2.34) |
| <b>Mother's traits</b>                |                                |               |                                |               |                                   |               |                                   |               |
| Less than HS                          | 1.25                           | (0.76 - 1.99) | 1.74                           | (0.76 - 3.95) | 1.34                              | (0.65 - 2.80) | 0.58                              | (0.31 - 1.09) |
| Worked at age 14                      | 0.81                           | (0.54 - 1.22) | 1.25                           | (0.70 - 2.24) | 1.16                              | (0.62 - 2.15) | 1.64                              | (0.82 - 3.33) |
| Intercept                             | 0.69                           | (0.37 - 1.29) | 0.11***                        | (0.04 - 0.30) | 0.17***                           | (0.06 - 0.43) | 0.19***                           | (0.08 - 0.49) |
| <b>Model 3: M2+ Gender beliefs</b>    |                                |               |                                |               |                                   |               |                                   |               |
| <b>EAM (ref.=Homo)</b>                |                                |               |                                |               |                                   |               |                                   |               |
| Hyper (W<H)                           | 1.29                           | (0.82 - 2.03) | 1.14                           | (0.56 - 2.34) | 0.80                              | (0.40 - 1.62) | 0.82                              | (0.40 - 1.71) |
| Hypo (W>H)                            | 1.07                           | (0.60 - 1.91) | 2.49*                          | (1.19 - 5.22) | 1.08                              | (0.49 - 2.40) | 2.02                              | (0.96 - 4.27) |
| <b>Maternal traits at 14</b>          |                                |               |                                |               |                                   |               |                                   |               |
| Two parent hh                         | 0.91                           | (0.58 - 1.41) | 0.79                           | (0.43 - 1.47) | 1.32                              | (0.70 - 2.49) | 1.24                              | (0.63 - 2.43) |
| Less than HS (higher)                 | 1.03                           | (0.63 - 1.66) | 1.75                           | (0.73 - 4.17) | 1.21                              | (0.60 - 2.45) | 0.53                              | (0.27 - 1.05) |
| Working (Not)                         | 1.00                           | (0.66 - 1.53) | 1.24                           | (0.68 - 2.25) | 1.32                              | (0.71 - 2.47) | 1.95                              | (0.95 - 3.97) |
| <b>Traditional values</b>             |                                |               |                                |               |                                   |               |                                   |               |
| Anticipated to work -35               | 2.88***                        | (1.94 - 4.26) | 0.86                           | (0.47 - 1.55) | 1.94*                             | (1.16 - 3.22) | 1.95*                             | (1.05 - 3.61) |
| Anticipated # of child (0)            | 0.88                           | (0.45 - 1.72) | 0.95                           | (0.34 - 2.67) | 0.99                              | (0.40 - 2.46) | 0.57                              | (0.25 - 1.28) |
| <b>One</b>                            |                                |               |                                |               |                                   |               |                                   |               |
| Two or more                           | 1.42                           | (0.43 - 4.71) | 0.99                           | (0.20 - 4.92) | 0.93                              | (0.19 - 4.54) | 0.48                              | (0.08 - 2.98) |
| <b>Two or more</b>                    |                                |               |                                |               |                                   |               |                                   |               |
| Intercept                             | 0.91                           | (0.32 - 2.62) | 1.11                           | (0.27 - 4.47) | 0.72                              | (0.18 - 2.92) | 0.87                              | (0.20 - 3.77) |
| Intercept                             | 0.78                           | (0.21 - 2.84) | 0.11*                          | (0.02 - 0.72) | 0.23                              | (0.03 - 1.65) | 0.35                              | (0.06 - 1.93) |

Table A6 (Continued)

|                                         | Consistently<br>secondary, low |               | Consistently<br>primary earner |               | Increasing,<br>secondary to equal |               | Decreasing, equal to<br>secondary |               |
|-----------------------------------------|--------------------------------|---------------|--------------------------------|---------------|-----------------------------------|---------------|-----------------------------------|---------------|
|                                         | OR                             | 95th CI       | OR                             | 95th CI       | OR                                | 95th CI       | OR                                | 95th CI       |
| <b>Model 4: M3+ Respondent's Traits</b> |                                |               |                                |               |                                   |               |                                   |               |
| <b>EAM (ref.=Homo)</b>                  |                                |               |                                |               |                                   |               |                                   |               |
| Hyper (W<H)                             | 1.24                           | (0.76 - 2.02) | 1.05                           | (0.51 - 2.18) | 0.76                              | (0.36 - 1.57) | 0.99                              | (0.46 - 2.13) |
| Hypo (W>H)                              | 1.10                           | (0.59 - 2.05) | 3.00*                          | (1.23 - 7.30) | 1.22                              | (0.54 - 2.80) | 2.09                              | (0.96 - 4.57) |
| <b>Maternal traits at 14</b>            |                                |               |                                |               |                                   |               |                                   |               |
| Two parent hh                           | 0.97                           | (0.61 - 1.55) | 0.78                           | (0.40 - 1.55) | 1.39                              | (0.73 - 2.63) | 1.19                              | (0.59 - 2.39) |
| Less than HS (higher)                   | 0.97                           | (0.58 - 1.64) | 1.85                           | (0.71 - 4.81) | 1.22                              | (0.58 - 2.55) | 0.64                              | (0.31 - 1.31) |
| Working (Not)                           | 0.99                           | (0.64 - 1.53) | 1.17                           | (0.64 - 2.16) | 1.34                              | (0.72 - 2.48) | 1.97                              | (0.94 - 4.14) |
| <b>Traditional values</b>               | 2.32***                        | (1.56 - 3.49) | 0.93                           | (0.52 - 1.67) | 1.53                              | (0.91 - 2.59) | 2.13*                             | (1.15 - 3.95) |
| <b>Anticipated to work -35</b>          | 1.03                           | (0.49 - 2.15) | 1.06                           | (0.34 - 3.30) | 1.19                              | (0.44 - 3.22) | 0.63                              | (0.28 - 1.44) |
| <b>Anticipated # of child (0)</b>       |                                |               |                                |               |                                   |               |                                   |               |
| One                                     | 1.52                           | (0.38 - 6.07) | 0.95                           | (0.18 - 5.00) | 1.18                              | (0.20 - 7.02) | 0.52                              | (0.08 - 3.47) |
| Two or more                             | 0.86                           | (0.24 - 3.11) | 1.24                           | (0.29 - 5.34) | 0.79                              | (0.16 - 3.91) | 0.77                              | (0.15 - 3.83) |
| <b>Education (High school)</b>          |                                |               |                                |               |                                   |               |                                   |               |
| Less than HS                            | 1.01                           | (0.56 - 1.80) | 0.97                           | (0.39 - 2.42) | 1.02                              | (0.48 - 2.17) | 0.62                              | (0.22 - 1.71) |
| Some college                            | 0.99                           | (0.55 - 1.79) | 1.09                           | (0.43 - 2.75) | 0.82                              | (0.34 - 1.98) | 0.74                              | (0.32 - 1.70) |
| College graduate                        | 0.71                           | (0.27 - 1.91) | 1.02                           | (0.35 - 3.01) | 0.66                              | (0.17 - 2.53) | 1.54                              | (0.45 - 5.28) |
| <b>Children from prior union</b>        |                                |               |                                |               |                                   |               |                                   |               |
| Had (Did not)                           | 0.63                           | (0.35 - 1.12) | 1.17                           | (0.55 - 2.50) | 0.34*                             | (0.14 - 0.83) | 0.41                              | (0.15 - 1.11) |
| <b>Age at marriage (15-19)</b>          |                                |               |                                |               |                                   |               |                                   |               |
| 20-24                                   | 0.87                           | (0.49 - 1.57) | 0.30*                          | (0.12 - 0.77) | 0.62                              | (0.29 - 1.31) | 0.81                              | (0.31 - 2.08) |
| 25-29                                   | 0.67                           | (0.32 - 1.43) | 0.70                           | (0.27 - 1.83) | 1.17                              | (0.43 - 3.16) | 1.24                              | (0.39 - 3.90) |
| 30+                                     | 1.15                           | (0.46 - 2.87) | 0.49                           | (0.15 - 1.55) | 1.63                              | (0.51 - 5.21) | 0.50                              | (0.09 - 2.66) |
| <b>Unemployment spell (None)</b>        |                                |               |                                |               |                                   |               |                                   |               |
| Unemployed                              | 3.01***                        | (1.82 - 4.98) | 0.44*                          | (0.22 - 0.89) | 3.76***                           | (1.91 - 7.40) | 0.92                              | (0.46 - 1.81) |
| Constant                                | 0.38                           | (0.07 - 1.98) | 0.22                           | (0.03 - 1.73) | 0.09                              | (0.01 - 1.04) | 0.44                              | (0.05 - 3.66) |

Table A6 (Continued)

|                                                  | Consistently<br>secondary, low |               | Consistently<br>primary earner |                | Increasing,<br>secondary to equal |               | Decreasing, equal to<br>secondary |               |
|--------------------------------------------------|--------------------------------|---------------|--------------------------------|----------------|-----------------------------------|---------------|-----------------------------------|---------------|
|                                                  | OR                             | 95th CI       | OR                             | 95th CI        | OR                                | 95th CI       | OR                                | 95th CI       |
| <b>Model 5: M4 + Partnership characteristics</b> |                                |               |                                |                |                                   |               |                                   |               |
| <b>EAM (ref.=Homo)</b>                           |                                |               |                                |                |                                   |               |                                   |               |
| Hyper (W<H)                                      | 1.24                           | (0.76 - 2.03) | 1.34                           | (0.63 - 2.83)  | 0.78                              | (0.37 - 1.62) | 1.09                              | (0.49 - 2.44) |
| Hypo (W>H)                                       | 1.16                           | (0.60 - 2.21) | 3.02*                          | (1.19 - 7.67)  | 1.37                              | (0.60 - 3.13) | 2.06                              | (0.93 - 4.60) |
| <b>Maternal traits at 14</b>                     |                                |               |                                |                |                                   |               |                                   |               |
| Two parent hh                                    | 0.98                           | (0.60 - 1.59) | 0.84                           | (0.39 - 1.80)  | 1.37                              | (0.72 - 2.63) | 1.32                              | (0.65 - 2.69) |
| Less than HS (higher)                            | 0.98                           | (0.58 - 1.66) | 1.95                           | (0.69 - 5.50)  | 1.22                              | (0.58 - 2.58) | 0.65                              | (0.32 - 1.34) |
| Working (Not)                                    | 1.00                           | (0.64 - 1.55) | 1.04                           | (0.53 - 2.06)  | 1.34                              | (0.72 - 2.49) | 1.88                              | (0.90 - 3.92) |
| <b>Traditional values</b>                        | 2.39***                        | (1.59 - 3.61) | 0.83                           | (0.44 - 1.57)  | 1.58                              | (0.94 - 2.64) | 2.11*                             | (1.15 - 3.90) |
| <b>Anticipated to work -35</b>                   | 1.07                           | (0.50 - 2.29) | 0.88                           | (0.27 - 2.88)  | 1.20                              | (0.44 - 3.22) | 0.54                              | (0.24 - 1.22) |
| <b>Anticipated # of child (0)</b>                |                                |               |                                |                |                                   |               |                                   |               |
| One                                              | 1.17                           | (0.35 - 3.89) | 1.77                           | (0.22-14.21)   | 0.88                              | (0.17 - 4.67) | 0.54                              | (0.08 - 3.78) |
| Two or more                                      | 0.75                           | (0.25 - 2.22) | 1.39                           | (0.23 - 8.32)  | 0.67                              | (0.14 - 2.99) | 0.72                              | (0.14- 3.68)  |
| <b>Education (High school)</b>                   |                                |               |                                |                |                                   |               |                                   |               |
| Less than HS                                     | 1.13                           | (0.62 - 2.06) | 0.49                           | (0.18 - 1.33)  | 1.07                              | (0.50 - 2.30) | 0.43                              | (0.14 - 1.29) |
| Some college                                     | 0.96                           | (0.53 - 1.76) | 1.67                           | (0.58 - 4.81)  | 0.75                              | (0.32 - 1.77) | 0.86                              | (0.37 - 2.10) |
| College graduate                                 | 0.61                           | (0.22 - 1.65) | 1.62                           | (0.38 - 6.89)  | 0.55                              | (0.14 - 2.08) | 2.15                              | (0.62 - 7.43) |
| <b>Children from prior union</b>                 |                                |               |                                |                |                                   |               |                                   |               |
| Had (Did not)                                    | 0.59                           | (0.31 - 1.09) | 1.45                           | (0.61 - 3.42)  | 0.31*                             | (0.12 - 0.79) | 0.37                              | (0.13 - 1.06) |
| <b>Age at marriage (15-19)</b>                   |                                |               |                                |                |                                   |               |                                   |               |
| 20-24                                            | 0.89                           | (0.49 - 1.61) | 0.19**                         | (0.058 - 0.59) | 0.64                              | (0.30 - 1.35) | 0.71                              | (0.26 - 1.94) |
| 25-29                                            | 0.58                           | (0.26 - 1.29) | 0.71                           | (0.23 - 2.18)  | 1.09                              | (0.40 - 2.94) | 1.16                              | (0.34- 3.94)  |
| 30+                                              | 1.08                           | (0.40 - 2.89) | 0.38                           | (0.07 - 2.07)  | 1.72                              | (0.51 - 5.78) | 0.39                              | (0.07 - 2.21) |



Table A6 (Continued)

|                                               | Consistently<br>secondary, low |               | Consistently<br>primary earner |               | Increasing,<br>secondary to equal |               | Decreasing, equal to<br>secondary |               |
|-----------------------------------------------|--------------------------------|---------------|--------------------------------|---------------|-----------------------------------|---------------|-----------------------------------|---------------|
|                                               | OR                             | 95th CI       | OR                             | 95th CI       | OR                                | 95th CI       | OR                                | 95th CI       |
| <b>Unemployment spell (None)</b>              |                                |               |                                |               |                                   |               |                                   |               |
| Unemployed                                    | 3.44***                        | (2.05 - 5.78) | 0.25***                        | (0.12 - 0.52) | 4.03***                           | (1.97 - 8.26) | 0.73                              | (0.36 - 1.49) |
| Husband's income (ref.=under<br>poverty line) |                                |               |                                |               |                                   |               |                                   |               |
| 100-199% poverty                              | 1.40                           | (0.61 - 3.19) | 0.18**                         | (0.06 - 0.52) | 1.90                              | (0.61 - 5.96) | 0.55                              | (0.20 - 1.52) |
| 200+% poverty                                 | 2.78**                         | (1.40 - 5.50) | 0.05***                        | (0.02 - 0.10) | 2.34                              | (0.91 - 6.04) | 0.24***                           | (0.10 - 0.55) |
| Pre-marital cohabitation                      | 1.19                           | (0.70 - 2.03) | 0.89                           | (0.39 - 2.04) | 1.42                              | (0.67 - 2.98) | 1.64                              | (0.72 - 3.76) |
| Age gap (ref.=wife is older)                  |                                |               |                                |               |                                   |               |                                   |               |
| Spouses within 2 years                        | 0.74                           | (0.40 - 1.37) | 0.99                           | (0.41 - 2.41) | 1.18                              | (0.51 - 2.71) | 1.39                              | (0.59- 3.31)  |
| Husband is 5+ years older                     | 1.00                           | (0.50 - 2.02) | 0.77                           | (0.25 - 2.35) | 1.38                              | (0.51 - 3.73) | 1.56                              | (0.58 - 4.17) |
| Constant                                      | 0.20                           | (0.04 - 1.07) | 1.81                           | (0.14-24.39)  | 0.04*                             | (0.00 - 0.58) | 1.08                              | (0.11-11.04)  |

*Notes:* Data come from the NLSY79. Multinomial logistic regression models are estimated on the sub-sample of Hispanic women ( $N=679$ ). Coefficients are presented as relative risk ratios; 95% confidence intervals are in parentheses. Analyses are weighted. Statistical significance is indicated by: \* $p<.05$ , \*\* $p<.01$ , \*\*\* $p<.001$ .

**Table A7.** Distribution of trajectories of wives' share of couples' total annual income, by wives' race/ethnicity, pooled sample

| Wife's race/ethnicity | Wife is <i>increasing to parity</i> | Wife is <i>consistently low secondary</i> | Wife is <i>consistently high secondary</i> | Wife is <i>consistently equal earner</i> | Wife is <i>decreasing to secondary</i> | Wife is <i>consistently primary</i> |
|-----------------------|-------------------------------------|-------------------------------------------|--------------------------------------------|------------------------------------------|----------------------------------------|-------------------------------------|
| (a) NH White          | 10.9 <sup>c</sup>                   | 30.7 <sup>b,c</sup>                       | 25.6 <sup>c</sup>                          | 18.5 <sup>b</sup>                        | 10.2 <sup>b,c</sup>                    | 4.1 <sup>b</sup>                    |
| (b) NH Black          | 10.4 <sup>c</sup>                   | 19.0 <sup>a,c</sup>                       | 28.0                                       | 26.0 <sup>a,c</sup>                      | 7.6 <sup>a</sup>                       | 9.1 <sup>a,c</sup>                  |
| (c) Hispanic          | 13.6 <sup>a,b</sup>                 | 26.3 <sup>a,b</sup>                       | 30.3 <sup>a</sup>                          | 18.8 <sup>b</sup>                        | 8.1 <sup>a</sup>                       | 2.9 <sup>b</sup>                    |

*Notes:* Table shows the weighted percentages of White, Black, and Hispanic married women following each prototypical trajectory from Figure A2. Letter superscripts indicate statistically significant differences ( $p < .05$ ) in the probability of trajectory group membership between racial/ethnic groups: (a) different from NH White women, (b) different from NH Black women, (c) different from Hispanic women.

**Table A8.** Predicted probabilities of trajectory group membership by educational assortative mating and race/ethnicity

|                                     | Predicted probabilities |      |      | Statistical tests |             |              |             |             |              |
|-------------------------------------|-------------------------|------|------|-------------------|-------------|--------------|-------------|-------------|--------------|
|                                     | Hyper                   | Homo | Hypo | AMEs              |             |              | Contrasts   |             |              |
|                                     |                         |      |      | Hyper             | Hypo        | Hypo         | Hyper       | Hypo        | Hypo         |
|                                     |                         |      |      | vs.<br>Homo       | vs.<br>Homo | vs.<br>Hyper | vs.<br>Homo | vs.<br>Homo | vs.<br>Hyper |
|                                     | W<H                     | W=H  | W>H  |                   |             |              |             |             |              |
| <b>Increasing to parity</b>         |                         |      |      |                   |             |              |             |             |              |
| <i>a</i> White                      | 0.05                    | 0.07 | 0.08 |                   |             |              |             |             |              |
| <i>b</i> Black                      | 0.05                    | 0.09 | 0.05 |                   |             |              |             |             |              |
| <i>c</i> Hispanic                   | 0.08                    | 0.06 | 0.07 |                   |             |              |             |             |              |
| <b>Consistently secondary, low</b>  |                         |      |      |                   |             |              |             |             |              |
| <i>a</i> White                      | 0.43                    | 0.33 | 0.25 | ***               | **          | ***          | <i>b, c</i> |             | <i>b, c</i>  |
| <i>b</i> Black                      | 0.25                    | 0.25 | 0.19 |                   |             |              | <i>a</i>    |             | <i>a</i>     |
| <i>c</i> Hispanic                   | 0.27                    | 0.28 | 0.24 |                   |             |              | <i>a</i>    |             | <i>a</i>     |
| <b>Consistently secondary, high</b> |                         |      |      |                   |             |              |             |             |              |
| <i>a</i> White                      | 0.22                    | 0.30 | 0.30 | **                |             | *            | <i>b</i>    |             |              |
| <i>b</i> Black                      | 0.35                    | 0.30 | 0.34 |                   |             |              | <i>a</i>    |             |              |
| <i>c</i> Hispanic                   | 0.30                    | 0.36 | 0.31 |                   |             |              |             |             |              |
| <b>Consistently equal</b>           |                         |      |      |                   |             |              |             |             |              |
| <i>a</i> White                      | 0.16                    | 0.17 | 0.26 |                   | ***         | ***          |             |             |              |
| <i>b</i> Black                      | 0.22                    | 0.24 | 0.31 |                   | †           | *            |             |             |              |
| <i>c</i> Hispanic                   | 0.23                    | 0.21 | 0.26 |                   |             |              |             |             |              |
| <b>Decreasing to secondary</b>      |                         |      |      |                   |             |              |             |             |              |
| <i>a</i> White                      | 0.09                    | 0.10 | 0.05 |                   | **          | *            |             |             |              |
| <i>b</i> Black                      | 0.09                    | 0.06 | 0.04 |                   |             | *            |             |             |              |
| <i>c</i> Hispanic                   | 0.08                    | 0.08 | 0.08 |                   |             |              |             |             |              |
| <b>Consistently primary</b>         |                         |      |      |                   |             |              |             |             |              |
| <i>a</i> White                      | 0.04                    | 0.04 | 0.05 |                   |             |              |             |             |              |
| <i>b</i> Black                      | 0.05                    | 0.07 | 0.07 |                   |             |              | <i>c</i>    |             |              |
| <i>c</i> Hispanic                   | 0.04                    | 0.01 | 0.03 | †                 |             |              | <i>b</i>    |             |              |

*Notes:* Predicted probabilities are computed from a multinomial logistic regression model of trajectory group membership as a function of educational assortative mating, race/ethnicity, an interaction between the two, and controls. Full regression results available upon request. Average marginal effects (AMEs, or first differences) test whether predicted probabilities are significantly different between educational assortative mating categories, within each racial/ethnic group. Contrasts (or second differences) test whether the educational assortative mating effects are significantly different between racial/ethnic groups. Statistical significance of AMEs is indicated by: † $p<.10$ , \* $p<.10$ , \*\* $p<.05$ , \*\*\* $p<.01$ , two-tailed tests; statistically significant ( $p<.05$ ) contrasts indicated by letters.

### C. Appendix Figures

**Figure A1.** Change over time in educational assortative mating, by race/ethnicity

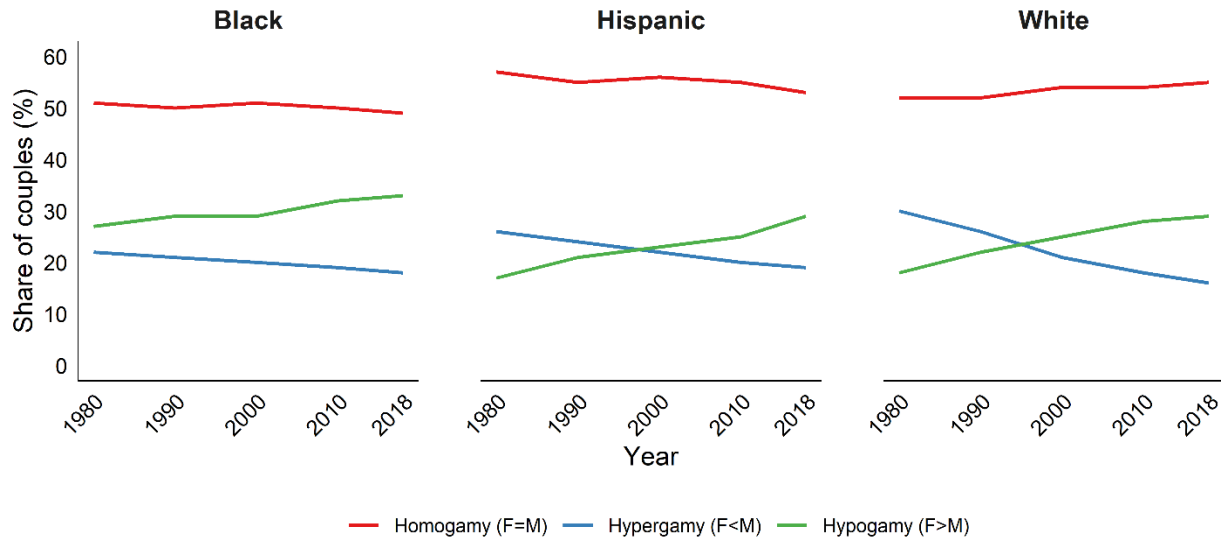

*Notes:* Authors' calculations of data from the Census (1980, 1990, 2000, 2010) and the 5-year American Community Survey (2018).

**Figure A2.** Group-based trajectories of the share of income earned by wives, pooled sample

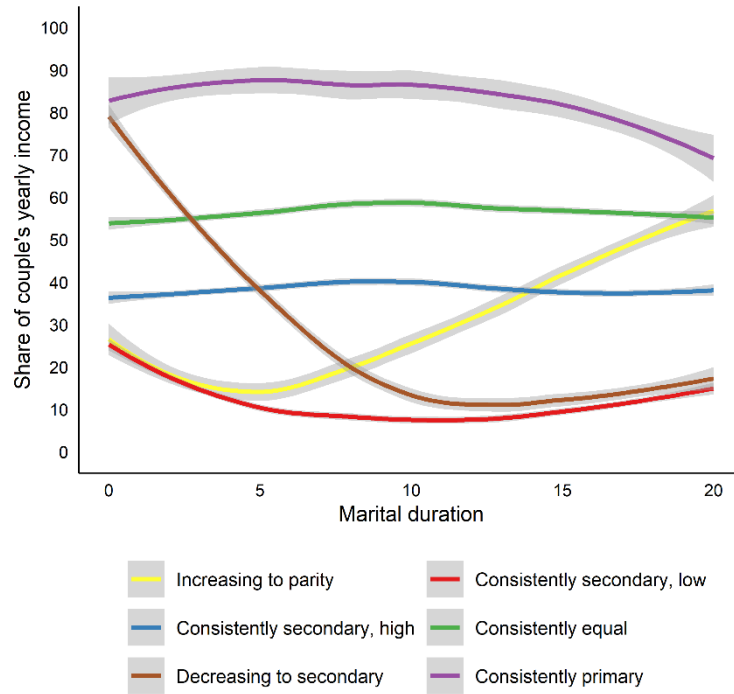

*Notes:* The figure is estimated using the results from our group-based trajectory models run on the pooled sample. Model includes linear, squared, and cubed measures of marital duration. Marital duration (in years) is on the x-axis; the percentage of a couple's total income earned contributed by wife is on the y-axis. Lines indicate the loess-smoothed average share over time within each group (95% confidence intervals are shaded in gray). Table A7 provides the share of each racial/ethnic group following each trajectory.
